Articles of interest in other COB journals

From *Journal of Cell Science*

**The muscle-specific microRNAs *miR-1* and *miR-133* produce opposing effects on apoptosis by targeting HSP60, HSP70 and caspase-9 in cardiomyocytes**

Chaoqian Xu, Yanjie Lu, Zhenwei Pan, Wenfeng Chu, Xiaobin Luo, Huixian Lin, Jiening Xiao, Hongli Shan, Zhiguo Wang and Baofeng Yang

Xu, C. et al. 2007. *J. Cell Sci.* doi:10.1242/jcs.010728

**The *Drosophila* homolog of the Exo84 exocyst subunit promotes apical epithelial identity**

J. Todd Blankenship, Margaret T. Fuller and Jennifer A. Zallen

Blankenship, J. T. et al. 2007. *J. Cell Sci.* doi:10.1242/jcs.004770
